# Supplementary material for: Impact of Low Lithium Concentrations on the Fatty Acids and Elemental Composition of Salvinia natans
Source: MDPI journal article supplement (doi:10.3390/molecules28145347), 2023-07-11
Supplement: s1 [file s1]

**Table S1.** Limit of detection (LOD) of elements in plants.

| Element | Na     | Mg     | K      | Ca     | Fe     | Cu    | Zn    | Mn    | Li    | Ba     | Cr     | Mn     | Co     | Ni     | Mo     |
|---------|--------|--------|--------|--------|--------|-------|-------|-------|-------|--------|--------|--------|--------|--------|--------|
| Unit    | mg/kg  | mg/kg  | mg/kg  | mg/kg  | mg/kg  | µg/kg | µg/kg | µg/kg | µg/kg | µg/kg  | µg/kg  | µg/kg  | µg/kg  | µg/kg  | µg/kg  |
| LOD     | 0.0032 | 0.0036 | 0.0012 | 0.0016 | 0.0032 | 0.084 | 0.124 | 0.052 | 0.012 | 0.0001 | 0.0001 | 0.0001 | 0.0001 | 0.0001 | 0.0001 |
